# Supplementary material for: Serum Clusterin: A Potential Marker for Assessing the Clinical Severity and Short-Term Prognosis of Hepatitis B Virus-Related Acute-on-Chronic Liver Failure
Source: Hindawi journal article supplement (doi:10.1155/2020/8814841), 2020-12-15
Supplement: f1 [file 8814841.f1.pdf]

| groups: 1 HBV-ACI | number | ID        | outcome (survival 1, | survival time | gender (female 1, | age   |
|-------------------|--------|-----------|----------------------|---------------|-------------------|-------|
| 1.00              | 1.00   | 400822.00 | 1.00                 | 31.00         | 2.00              | 53.00 |
| 1.00              | 2.00   | 845286.00 | 1.00                 | 41.00         | 1.00              | 60.00 |
| 1.00              | 3.00   | 876085.00 | 0.00                 | 15.00         | 2.00              | 53.00 |
| 1.00              | 4.00   | 877143.00 | 1.00                 | 50.00         | 2.00              | 45.00 |
| 1.00              | 5.00   | 879105.00 | 1.00                 | 39.00         | 2.00              | 37.00 |
| 1.00              | 6.00   | 160796.00 | 1.00                 | 11.00         | 2.00              | 30.00 |
| 1.00              | 7.00   | 396708.00 | 1.00                 | 24.00         | 2.00              | 67.00 |
| 1.00              | 8.00   | 892052.00 | 1.00                 | 8.00          | 2.00              | 27.00 |
| 1.00              | 9.00   | 901814.00 | 1.00                 | 27.00         | 2.00              | 29.00 |
| 1.00              | 10.00  | 907502.00 | 1.00                 | 10.00         | 2.00              | 36.00 |
| 1.00              | 11.00  | 911466.00 | 1.00                 | 21.00         | 2.00              | 58.00 |
| 1.00              | 12.00  | 913685.00 | 1.00                 | 21.00         | 2.00              | 25.00 |
| 1.00              | 13.00  | 926708.00 | 1.00                 | 13.00         | 2.00              | 31.00 |
| 1.00              | 14.00  | 940395.00 | 0.00                 | 34.00         | 2.00              | 47.00 |
| 1.00              | 15.00  | 932557.00 | 1.00                 | 30.00         | 2.00              | 37.00 |
| 1.00              | 16.00  | 955737.00 | 1.00                 | 41.00         | 2.00              | 30.00 |
| 1.00              | 17.00  | 962306.00 | 1.00                 | 22.00         | 2.00              | 37.00 |
| 1.00              | 18.00  | 961800.00 | 1.00                 | 49.00         | 2.00              | 49.00 |
| 1.00              | 19.00  | 964698.00 | 1.00                 | 21.00         | 2.00              | 37.00 |
| 1.00              | 20.00  | 253002.00 | 1.00                 | 53.00         | 1.00              | 53.00 |
| 1.00              | 21.00  | 887168.00 | 1.00                 | 29.00         | 2.00              | 56.00 |
| 1.00              | 22.00  | 467930.00 | 0.00                 | 11.00         | 1.00              | 56.00 |
| 1.00              | 23.00  | 826056.00 | 0.00                 | 22.00         | 1.00              | 36.00 |
| 1.00              | 24.00  | 684223.00 | 0.00                 | 10.00         | 2.00              | 60.00 |
| 1.00              | 25.00  | 686107.00 | 0.00                 | 15.00         | 2.00              | 38.00 |
| 1.00              | 26.00  | 678210.00 | 0.00                 | 26.00         | 2.00              | 52.00 |
| 1.00              | 27.00  | 659753.00 | 1.00                 | 20.00         | 1.00              | 43.00 |

|      |       |           |      |       |      |        |
|------|-------|-----------|------|-------|------|--------|
| 1.00 | 28.00 | 733770.00 | 1.00 | 31.00 | 2.00 | 44.00  |
| 1.00 | 29.00 | 535008.00 | 1.00 | 41.00 | 2.00 | 47.00  |
| 1.00 | 30.00 | 470524.00 | 0.00 | 18.00 | 2.00 | 52.00  |
| 1.00 | 31.00 | 719053.00 | 1.00 | 25.00 | 2.00 | 40.00  |
| 1.00 | 32.00 | 722126.00 | 1.00 | 28.00 | 2.00 | 34.00  |
| 1.00 | 33.00 | 813570.00 | 1.00 | 78.00 | 2.00 | 52.00  |
| 1.00 | 34.00 | 803674.00 | 0.00 | 8.00  | 1.00 | 61.00  |
| 1.00 | 35.00 | 800521.00 | 0.00 | 14.00 | 1.00 | 41.00  |
| 1.00 | 36.00 | 824552.00 | 0.00 | 19.00 | 2.00 | 46.00  |
| 1.00 | 37.00 | 786739.00 | 0.00 | 16.00 | 2.00 | 43.00  |
| 1.00 | 38.00 | 195916.00 | 1.00 | 9.00  | 2.00 | 43.00  |
| 1.00 | 39.00 | 752699.00 | 0.00 | 27.00 | 2.00 | 41.00  |
| 1.00 | 40.00 | 782014.00 | 1.00 | 18.00 | 2.00 | 42.00  |
| 1.00 | 41.00 | 538336.00 | 1.00 | 26.00 | 1.00 | 36.00  |
| 1.00 | 42.00 | 86381.00  | 1.00 | 58.00 | 2.00 | 50.00  |
| 1.00 | 43.00 | 365541.00 | 1.00 | 28.00 | 2.00 | 37.00  |
| 1.00 | 44.00 | 678823.00 | 1.00 | 33.00 | 2.00 | 62.00  |
| 1.00 | 45.00 | 124278.00 | 1.00 | 26.00 | 2.00 | 27.00  |
| 1.00 | 46.00 | 238932.00 | 1.00 | 38.00 | 2.00 | 35.00  |
| 1.00 | 47.00 | 451232.00 | 0.00 | 36.00 | 1.00 | 55.00  |
| 1.00 | 48.00 | 127034.00 | 0.00 | 12.00 | 1.00 | 55.00  |
| 1.00 | 49.00 | 330506.00 | 0.00 | 35.00 | 2.00 | 40.00  |
| 1.00 | 50.00 | 187616.00 | 0.00 | 11.00 | 2.00 | 50.00  |
| 1.00 | 51.00 | 519676.00 | 0.00 | 68.00 | 2.00 | 43.00  |
| 1.00 | 52.00 | 536208.00 | 0.00 | 69.00 | 1.00 | 689.00 |
| 1.00 | 53.00 | 545405.00 | 0.00 | 84.00 | 2.00 | 38.00  |
| 1.00 | 54.00 | 551229.00 | 0.00 | 37.00 | 2.00 | 48.00  |
| 1.00 | 55.00 | 246617.00 | 0.00 | 48.00 | 1.00 | 49.00  |
| 1.00 | 56.00 | 553355.00 | 0.00 | 16.00 | 2.00 | 45.00  |
| 1.00 | 57.00 | 362356.00 | 0.00 | 26.00 | 2.00 | 70.00  |

|      |       |                           |      |       |      |       |
|------|-------|---------------------------|------|-------|------|-------|
| 1.00 | 58.00 | 268286.00                 | 0.00 | 14.00 | 2.00 | 44.00 |
| 1.00 | 59.00 | 608160.00                 | 0.00 | 21.00 | 1.00 | 48.00 |
| 1.00 | 60.00 | 622780.00                 | 0.00 | 49.00 | 2.00 | 49.00 |
| 1.00 | 61.00 | 629446.00                 | 0.00 | 16.00 | 2.00 | 49.00 |
| 1.00 | 62.00 | 305234.00                 | 0.00 | 57.00 | 1.00 | 61.00 |
| 1.00 | 63.00 | 381260.00                 | 0.00 | 46.00 | 2.00 | 37.00 |
| 1.00 | 64.00 | 324371.00                 | 0.00 | 61.00 | 1.00 | 54.00 |
| 1.00 | 65.00 | 353674.00                 | 0.00 | 35.00 | 2.00 | 42.00 |
| 1.00 | 66.00 | 330119.00                 | 0.00 | 26.00 | 2.00 | 53.00 |
| 1.00 | 67.00 | 409177.00                 | 0.00 | 9.00  | 2.00 | 56.00 |
| 1.00 | 68.00 | 441758.00                 | 1.00 | 44.00 | 2.00 | 45.00 |
| 1.00 | 69.00 | 443336.00                 | 1.00 | 29.00 | 2.00 | 40.00 |
| 1.00 | 70.00 | 443824.00                 | 1.00 | 23.00 | 2.00 | 38.00 |
| 1.00 | 71.00 | 444606.00                 | 1.00 | 25.00 | 2.00 | 42.00 |
| 1.00 | 72.00 | 450819.00                 | 1.00 | 34.00 | 1.00 | 40.00 |
| 1.00 | 73.00 | 476389.00                 | 1.00 | 39.00 | 1.00 | 49.00 |
| 1.00 | 74.00 | 513934.00                 | 1.00 | 24.00 | 2.00 | 52.00 |
| 1.00 | 75.00 | 520924.00                 | 1.00 | 29.00 | 2.00 | 30.00 |
| 1.00 | 76.00 | 538866.00                 | 1.00 | 19.00 | 2.00 | 21.00 |
| 1.00 | 77.00 | 552778.00                 | 1.00 | 31.00 | 2.00 | 65.00 |
| 1.00 | 78.00 | 565982.00                 | 1.00 | 27.00 | 2.00 | 34.00 |
| 1.00 | 79.00 | 589720.00                 | 1.00 | 52.00 | 2.00 | 44.00 |
| 1.00 | 80.00 | 595681.00                 | 1.00 | 29.00 | 2.00 | 46.00 |
| 1.00 | 81.00 | 598796.00                 | 1.00 | 30.00 | 1.00 | 39.00 |
| 1.00 | 82.00 | 601295.00                 | 1.00 | 30.00 | 2.00 | 30.00 |
| 1.00 | 83.00 | 14945.00                  | 1.00 | 25.00 | 2.00 | 54.00 |
| 1.00 | 84.00 | 617105.00                 | 1.00 | 22.00 | 2.00 | 47.00 |
| 1.00 | 85.00 | 618275.00                 | 1.00 | 27.00 | 2.00 | 44.00 |
| 1.00 | 86.00 | 553491.00                 | 1.00 | 24.00 | 2.00 | 34.00 |
| 1.00 | 87.00 | <a href="#">553491.00</a> | 1.00 | 26.00 | 2.00 | 34.00 |

|      |        |                  |      |          |      |       |
|------|--------|------------------|------|----------|------|-------|
| 1.00 | 88.00  | 558905.00        | 1.00 | 38.00    | 2.00 | 45.00 |
| 1.00 | 89.00  | 391919.00        | 1.00 | 16.00    | 2.00 | 26.00 |
| 1.00 | 90.00  | 378214.00        | 1.00 | 27.00    | 1.00 | 59.00 |
| 1.00 | 91.00  | 0000475966 (2013 | 1.00 | 28.00    | 1.00 | 58.00 |
| 1.00 | 92.00  | 443998 (2015-09- | 1.00 | 20.00    | 2.00 | 44.00 |
| 1.00 | 93.00  | 503624.00        | 1.00 | 28.00    | 2.00 | 59.00 |
| 1.00 | 94.00  | 586608 (2014-06- | 1.00 | 9.00     | 1.00 | 44.00 |
| 1.00 | 95.00  | 287259.00        | 1.00 | 29.00    | 2.00 | 46.00 |
| 1.00 | 96.00  | 337661.00        | 1.00 | 35.00    | 2.00 | 69.00 |
| 1.00 | 97.00  | 426323.00        | 1.00 | 16.00    | 2.00 | 37.00 |
| 1.00 | 98.00  | 451232.00        | 1.00 | 35.00    | 1.00 | 60.00 |
| 1.00 | 99.00  | 435690.00        | 1.00 | 27.00    | 2.00 | 35.00 |
| 1.00 | 100.00 | 402389.00        | 1.00 | 19.00    | 2.00 | 43.00 |
| 1.00 | 101.00 | 689416.00        | 1.00 | 28.00    | 2.00 | 44.00 |
| 1.00 | 102.00 | 733770.00        | 1.00 | 30.00    | 2.00 | 44.00 |
| 1.00 | 103.00 | 541853.00        | 1.00 | 19.00    | 2.00 | 30.00 |
| 1.00 | 104.00 | 722126 (2015-7-1 | 1.00 | 27.00    | 2.00 | 34.00 |
| 1.00 | 105.00 | 468434           | 1.00 | 23.00    | 2.00 | 45.00 |
| 1.00 | 106.00 | 719053.00        | 2.00 | 25.00    | 2.00 | 40.00 |
| 1.00 | 107.00 | 417296.00        | 1.00 | 37.00    | 1.00 | 54.00 |
| 1.00 | 108.00 | 758933.00        | 1.00 | 31.00    | 2.00 | 23.00 |
| 2.00 | 1.00   | 879206.00        | 0.00 | >90 days | 2.00 | 25.00 |
| 2.00 | 2.00   | 286872.00        | 0.00 | >90 days | 2.00 | 49.00 |
| 2.00 | 3.00   | 182973.00        | 0.00 | >90 days | 2.00 | 24.00 |
| 2.00 | 4.00   | 129968.00        | 0.00 | >90 days | 2.00 | 27.00 |
| 2.00 | 5.00   | 235351.00        | 0.00 | >90 days | 1.00 | 21.00 |
| 2.00 | 6.00   | 23682.00         | 0.00 | >90 days | 1.00 | 49.00 |
| 2.00 | 7.00   | 10863.00         | 0.00 | >90 days | 1.00 | 22.00 |
| 2.00 | 8.00   | 38652.00         | 0.00 | >90 days | 2.00 | 27.00 |
| 2.00 | 9.00   | 230752.00        | 0.00 | >90 days | 2.00 | 46.00 |

|      |       |            |      |          |      |       |
|------|-------|------------|------|----------|------|-------|
| 2.00 | 10.00 | 3467432.00 | 0.00 | >90 days | 2.00 | 35.00 |
| 2.00 | 11.00 | 458032.00  | 0.00 | >90 days | 2.00 | 43.00 |
| 2.00 | 12.00 | 578543.00  | 0.00 | >90 days | 2.00 | 38.00 |
| 2.00 | 13.00 | 379875.00  | 0.00 | >90 days | 2.00 | 58.00 |
| 2.00 | 14.00 | 207653.00  | 0.00 | >90 days | 1.00 | 59.00 |
| 2.00 | 15.00 | 248654.00  | 0.00 | >90 days | 1.00 | 24.00 |
| 2.00 | 16.00 | 456905.00  | 0.00 | >90 days | 2.00 | 29.00 |
| 2.00 | 17.00 | 456965.00  | 0.00 | >90 days | 2.00 | 32.00 |
| 2.00 | 18.00 | 4578433.00 | 0.00 | >90 days | 2.00 | 27.00 |
| 2.00 | 19.00 | 6779544.00 | 0.00 | >90 days | 2.00 | 30.00 |
| 2.00 | 20.00 | 976534.00  | 0.00 | >90 days | 2.00 | 69.00 |
| 2.00 | 21.00 | 233575.00  | 0.00 | >90 days | 2.00 | 21.00 |
| 2.00 | 22.00 | 225534.00  | 0.00 | >90 days | 2.00 | 29.00 |
| 2.00 | 23.00 | 184979.00  | 0.00 | >90 days | 2.00 | 28.00 |
| 2.00 | 24.00 | 184882.00  | 0.00 | >90 days | 2.00 | 32.00 |
| 2.00 | 25.00 | 184058.00  | 0.00 | >90 days | 2.00 | 48.00 |
| 2.00 | 26.00 | 185419.00  | 0.00 | >90 days | 2.00 | 45.00 |
| 2.00 | 27.00 | 848729.00  | 0.00 | >90 days | 2.00 | 40.00 |
| 2.00 | 28.00 | 422215.00  | 0.00 | >90 days | 2.00 | 34.00 |
| 2.00 | 29.00 | 850174.00  | 0.00 | >90 days | 1.00 | 25.00 |
| 2.00 | 30.00 | 832351.00  | 0.00 | >90 days | 1.00 | 28.00 |
| 2.00 | 31.00 | 855089.00  | 0.00 | >90 days | 2.00 | 34.00 |
| 2.00 | 32.00 | 854690.00  | 0.00 | >90 days | 1.00 | 57.00 |
| 2.00 | 33.00 | 245234.00  | 0.00 | >90 days | 2.00 | 47.00 |
| 2.00 | 34.00 | 858607.00  | 0.00 | >90 days | 2.00 | 41.00 |
| 2.00 | 35.00 | 531664.00  | 0.00 | >90 days | 2.00 | 29.00 |
| 2.00 | 36.00 | 865189.00  | 0.00 | >90 days | 2.00 | 49.00 |
| 2.00 | 37.00 | 860341.00  | 0.00 | >90 days | 2.00 | 41.00 |
| 2.00 | 38.00 | 867912.00  | 0.00 | >90 days | 1.00 | 46.00 |
| 2.00 | 39.00 | 884788.00  | 0.00 | >90 days | 2.00 | 39.00 |

|      |       |           |      |          |      |       |
|------|-------|-----------|------|----------|------|-------|
| 2.00 | 40.00 | 471778.00 | 0.00 | >90 days | 2.00 | 35.00 |
| 2.00 | 41.00 | 835416.00 | 0.00 | >90 days | 2.00 | 27.00 |
| 2.00 | 42.00 | 721313.00 | 0.00 | >90 days | 1.00 | 21.00 |
| 2.00 | 43.00 | 179143.00 | 0.00 | >90 days | 2.00 | 22.00 |
| 2.00 | 44.00 | 840355.00 | 0.00 | >90 days | 2.00 | 28.00 |
| 2.00 | 45.00 | 538336.00 | 0.00 | >90 days | 2.00 | 36.00 |
| 2.00 | 46.00 | 736914.00 | 0.00 | >90 days | 2.00 | 34.00 |
| 2.00 | 47.00 | 760286.00 | 0.00 | >90 days | 1.00 | 29.00 |
| 2.00 | 48.00 | 660074.00 | 0.00 | >90 days | 2.00 | 35.00 |
| 2.00 | 49.00 | 401310.00 | 0.00 | >90 days | 2.00 | 49.00 |
| 2.00 | 50.00 | 431787.00 | 0.00 | >90 days | 2.00 | 77.00 |
| 2.00 | 51.00 | 445868.00 | 0.00 | >90 days | 2.00 | 33.00 |
| 2.00 | 52.00 | 445092.00 | 0.00 | >90 days | 2.00 | 69.00 |
| 2.00 | 53.00 | 416300.00 | 0.00 | >90 days | 2.00 | 51.00 |
| 2.00 | 54.00 | 594903.00 | 0.00 | >90 days | 2.00 | 49.00 |
| 2.00 | 55.00 | 457742.00 | 0.00 | >90 days | 2.00 | 41.00 |
| 2.00 | 56.00 | 412324.00 | 0.00 | >90 days | 2.00 | 43.00 |
| 2.00 | 57.00 | 453739    | 0.00 | >90 days | 2.00 | 31.00 |
| 2.00 | 58.00 | 597810.00 | 0.00 | >90 days | 2.00 | 27.00 |
| 2.00 | 59.00 | 407768    | 0.00 | >90 days | 2.00 | 38.00 |
| 2.00 | 60.00 | 139059.00 | 0.00 | >90 days | 2.00 | 36.00 |
| 2.00 | 61.00 | 210784.00 | 0.00 | >90 days | 2.00 | 34.00 |
| 2.00 | 62.00 | 458232.00 | 0.00 | >90 days | 2.00 | 57.00 |
| 2.00 | 63.00 | 458278.00 | 0.00 | >90 days | 2.00 | 36.00 |
| 3.00 | 1.00  | 1.00      | 0.00 | >90 days | 1.00 | 47.00 |
| 3.00 | 2.00  | 2.00      | 0.00 | >90 days | 1.00 | 40.00 |
| 3.00 | 3.00  | 3.00      | 0.00 | >90 days | 1.00 | 31.00 |
| 3.00 | 4.00  | 4.00      | 0.00 | >90 days | 1.00 | 30.00 |
| 3.00 | 5.00  | 5.00      | 0.00 | >90 days | 1.00 | 29.00 |
| 3.00 | 6.00  | 6.00      | 0.00 | >90 days | 1.00 | 28.00 |

|      |       |       |      |          |      |       |
|------|-------|-------|------|----------|------|-------|
| 3.00 | 7.00  | 7.00  | 0.00 | >90 days | 2.00 | 44.00 |
| 3.00 | 8.00  | 8.00  | 0.00 | >90 days | 1.00 | 31.00 |
| 3.00 | 9.00  | 9.00  | 0.00 | >90 days | 1.00 | 32.00 |
| 3.00 | 10.00 | 10.00 | 0.00 | >90 days | 1.00 | 79.00 |
| 3.00 | 11.00 | 11.00 | 0.00 | >90 days | 1.00 | 32.00 |
| 3.00 | 12.00 | 12.00 | 0.00 | >90 days | 1.00 | 48.00 |
| 3.00 | 13.00 | 13.00 | 0.00 | >90 days | 1.00 | 31.00 |
| 3.00 | 14.00 | 14.00 | 0.00 | >90 days | 1.00 | 53.00 |
| 3.00 | 15.00 | 15.00 | 0.00 | >90 days | 1.00 | 25.00 |
| 3.00 | 16.00 | 16.00 | 0.00 | >90 days | 1.00 | 41.00 |
| 3.00 | 17.00 | 17.00 | 0.00 | >90 days | 1.00 | 29.00 |
| 3.00 | 18.00 | 18.00 | 0.00 | >90 days | 1.00 | 48.00 |
| 3.00 | 19.00 | 19.00 | 0.00 | >90 days | 1.00 | 54.00 |
| 3.00 | 20.00 | 20.00 | 0.00 | >90 days | 2.00 | 33.00 |
| 3.00 | 21.00 | 21.00 | 0.00 | >90 days | 2.00 | 60.00 |
| 3.00 | 22.00 | 22.00 | 0.00 | >90 days | 2.00 | 41.00 |
| 3.00 | 23.00 | 23.00 | 0.00 | >90 days | 1.00 | 29.00 |
| 3.00 | 24.00 | 24.00 | 0.00 | >90 days | 1.00 | 84.00 |
| 3.00 | 25.00 | 25.00 | 0.00 | >90 days | 1.00 | 29.00 |
| 3.00 | 26.00 | 26.00 | 0.00 | >90 days | 1.00 | 26.00 |
| 3.00 | 27.00 | 27.00 | 0.00 | >90 days | 1.00 | 37.00 |
| 3.00 | 28.00 | 28.00 | 0.00 | >90 days | 1.00 | 31.00 |
| 3.00 | 29.00 | 29.00 | 0.00 | >90 days | 1.00 | 31.00 |
| 3.00 | 30.00 | 30.00 | 0.00 | >90 days | 1.00 | 34.00 |
| 3.00 | 31.00 | 31.00 | 0.00 | >90 days | 1.00 | 43.00 |
| 3.00 | 32.00 | 32.00 | 0.00 | >90 days | 1.00 | 30.00 |
| 3.00 | 33.00 | 33.00 | 0.00 | >90 days | 1.00 | 31.00 |
| 3.00 | 34.00 | 34.00 | 0.00 | >90 days | 1.00 | 22.00 |
| 3.00 | 35.00 | 35.00 | 0.00 | >90 days | 1.00 | 29.00 |
| 3.00 | 36.00 | 36.00 | 0.00 | >90 days | 2.00 | 52.00 |

|      |       |       |      |          |      |       |
|------|-------|-------|------|----------|------|-------|
| 3.00 | 37.00 | 37.00 | 0.00 | >90 days | 2.00 | 41.00 |
| 3.00 | 38.00 | 38.00 | 0.00 | >90 days | 1.00 | 32.00 |
| 3.00 | 39.00 | 39.00 | 0.00 | >90 days | 2.00 | 56.00 |
| 3.00 | 40.00 | 40.00 | 0.00 | >90 days | 2.00 | 42.00 |
| 3.00 | 41.00 | 41.00 | 0.00 | >90 days | 1.00 | 46.00 |
| 3.00 | 42.00 | 42.00 | 0.00 | >90 days | 2.00 | 34.00 |
| 3.00 | 43.00 | 43.00 | 0.00 | >90 days | 1.00 | 44.00 |
| 3.00 | 44.00 | 44.00 | 0.00 | >90 days | 1.00 | 34.00 |



| ALTO    | ASTO   | TBILO  | TBIL (MG/DL) | ALBO   | Cr0    | Cr (mg/dl) | PTAO  | INRO | AFP    | HBVDNA       |
|---------|--------|--------|--------------|--------|--------|------------|-------|------|--------|--------------|
| 561.00  | 422.40 | 380.50 | 22.25        | 27.90  | 73.50  | 0.83       | 29.00 | 2.60 | 131.10 | 2750000.00   |
| 775.90  | 725.10 | 319.60 | 18.69        | 31.60  | 38.40  | 0.43       | 35.00 | 2.43 | 345.40 | 12600.00     |
| 1370.90 | 816.90 | 261.20 | 15.27        | 37.00  | 60.00  | 0.68       | 29.00 | 2.77 | 18.20  | 32300000.00  |
| 461.40  | 531.30 | 312.40 | 18.27        | 31.00  | 67.60  | 0.76       | 41.00 | 2.07 | 388.20 | 471000.00    |
| 265.80  | 547.20 | 330.70 | 19.34        | 31.00  | 50.00  | 0.57       | 44.00 | 1.78 | 307.00 | 232000.00    |
| 1543.10 | 933.00 | 230.80 | 13.50        | 30.60  | 60.00  | 0.68       | 20.00 | 3.91 | 11.30  | 47500.00     |
| 265.00  | 212.20 | 182.70 | 10.68        | 31.20  | 54.00  | 0.61       | 46.00 | 1.92 | 247.50 | 139000.00    |
| 105.10  | 87.80  | 364.30 | 21.30        | 31.50  | 49.90  | 0.56       | 33.00 | 2.48 | 77.30  | 1460.00      |
| 336.50  | 428.00 | 118.10 | 6.91         | 34.70  | 80.30  | 0.91       | 32.00 | 2.59 |        | 33200.00     |
| 387.50  | 413.60 | 192.40 | 11.25        | 26.20  | 76.20  | 0.86       | 27.00 | 2.92 | 988.90 | 4190000.00   |
| 381.00  | 225.00 | 195.00 | 11.40        | 35.40  | 81.30  | 0.92       | 39.00 | 2.16 | 29.40  | 729000.00    |
| 1057.40 | 258.00 | 109.10 | 6.38         | 85.10  | 81.30  | 0.92       | 45.00 | 1.95 | 25.50  | 28300.00     |
| 1018.40 | 570.90 | 387.00 | 22.63        | 33.30  | 66.00  | 0.75       | 45.00 | 1.94 | 4.97   | 52600000.00  |
| 578.00  | 720.00 | 228.00 | 13.33        | 27.50  | 70.70  | 0.80       | 30.00 | 2.68 | 5.00   | 3140.00      |
| 578.00  | 638.00 | 349.60 | 20.44        | 32.80  | 75.00  | 0.85       | 34.00 | 2.41 | 191.10 | 3210.00      |
| 293.00  | 392.70 | 222.20 | 12.99        | 32.40  | 58.60  | 0.66       | 37.00 | 2.30 | 105.30 | 3850.00      |
| 469.30  | 177.80 | 367.70 | 21.50        | 30.60  | 49.00  | 0.55       | 35.00 | 2.13 | 642.40 | 1530000.00   |
| 269.30  | 915.90 | 264.30 | 15.46        | 30.00  | 63.00  | 0.71       | 33.00 | 2.50 | 157.00 | 214.00       |
| 223.80  | 495.00 | 131.70 | 7.70         | 34.30  | 63.10  | 0.71       | 24.00 | 2.99 | 519.70 | 2050000.00   |
| 292.20  | 286.80 | 431.10 | 25.21        | 31.20  | 63.30  | 0.72       | 40.00 | 1.80 | 93.50  | 11900.00     |
| 731.00  | 463.00 | 153.20 | 8.96         | 22.00  | 96.20  | 1.09       | 21.00 | 3.67 | 2.00   | 100.00       |
| 657.00  | 623.00 | 239.20 | 13.99        | 30.50  | 58.00  | 0.66       | 28.00 | 2.67 | 22.50  | 190000000.00 |
| 139.90  | 250.10 | 226.80 | 13.26        | 30.40  | 65.10  | 0.74       | 40.00 | 2.10 | 143.80 | 575.00       |
| 569.00  | 623.80 | 701.60 | 41.03        | 31.50  | 197.40 | 2.23       | 42.00 | 1.96 | 163.90 | 500.00       |
| 713.80  | 651.00 | 330.00 | 19.30        | 183.30 | 48.00  | 0.54       | 16.80 | 2.94 | 16.20  | 6880000.00   |
| 101.70  | 111.10 | 340.20 | 19.89        | 248.00 | 61.50  | 0.70       | 42.50 | 1.64 | 418.90 | 1000.00      |
| 496.00  | 736.00 | 183.40 | 10.73        | 26.80  | 61.00  | 0.69       | 42.80 | 1.63 | 27.80  | 62700.00     |

|         |         |        |       |        |        |      |       |      |         |             |
|---------|---------|--------|-------|--------|--------|------|-------|------|---------|-------------|
| 232.70  | 297.40  | 192.90 | 11.28 | 35.10  | 61.00  | 0.69 | 35.00 | 2.21 | 33.60   | 1160000.00  |
| 212.40  | 404.10  | 400.90 | 23.44 | 29.60  | 73.00  | 0.83 | 37.70 | 1.77 | 369.40  | 1580.00     |
| 306.00  | 685.00  | 284.50 | 16.64 | 33.20  | 86.00  | 0.97 | 17.00 | 4.19 | 8.10    | 454000.00   |
| 294.80  | 133.60  | 199.70 | 11.68 | 28.50  | 60.00  | 0.68 | 39.00 | 2.01 | 36.00   | 556000.00   |
| 343.10  | 329.40  | 313.70 | 18.35 | 29.10  | 56.00  | 0.63 | 46.00 | 1.77 | 170.50  | 230000.00   |
| 968.80  | 743.00  | 218.70 | 12.79 | 31.80  | 53.00  | 0.60 | 23.00 | 3.16 | 33.10   | 20700000.00 |
| 100.70  | 121.10  | 383.30 | 22.42 | 26.80  | 45.60  | 0.52 | 31.00 | 2.46 | 134.30  | 224000.00   |
| 470.40  | 777.20  | 359.10 | 21.00 | 32.50  | 79.10  | 0.89 | 13.00 | 5.32 | 171.30  | 844000.00   |
| 103.80  | 192.80  | 691.40 | 40.43 | 38.50  | 49.90  | 0.56 | 26.00 | 3.06 | 97.70   | 13500.00    |
| 370.30  | 170.40  | 334.30 | 19.55 | 30.60  | 79.10  | 0.89 | 37.40 | 1.77 | 11.20   | 60100.00    |
| 1139.10 | 400.30  | 361.30 | 21.13 | 446.10 | 57.10  | 0.65 | 27.60 | 2.15 | 87.40   | 384000.00   |
| 409.00  | 751.00  | 495.10 | 28.95 | 33.60  | 43.00  | 0.49 | 24.90 | 2.29 |         | 135.00      |
| 1330.20 | 1191.40 | 149.30 | 8.73  | 38.40  | 75.30  | 0.85 | 39.80 | 1.71 | 37.70   | 21400.00    |
| 466.70  | 313.10  | 127.60 | 7.46  | 31.50  | 62.00  | 0.70 | 47.00 | 1.62 | 136.10  | 4.14        |
| 231.00  | 549.00  | 137.30 | 8.03  | 63.80  | 42.00  | 0.48 | 51.50 | 1.50 | 37.00   | 1.32        |
| 150.50  | 177.50  | 162.60 | 9.51  | 36.40  | 78.00  | 0.88 | 34.00 | 2.05 |         | 4660.00     |
| 322.00  | 177.70  | 280.40 | 16.40 | 27.00  | 62.90  | 0.71 | 43.90 | 1.60 | 114.80  | 4450.00     |
| 1105.00 | 649.10  | 287.60 | 16.82 | 32.20  | 60.00  | 0.68 | 21.00 | 3.04 | 70.70   | 208.00      |
| 422.60  | 894.40  | 297.20 | 17.38 | 28.30  | 82.40  | 0.93 | 31.00 | 2.20 | 37.40   | 500.00      |
| 85.70   | 124.90  | 266.50 | 15.58 | 29.90  | 72.00  | 0.81 | 51.50 | 1.50 | 16.80   | 99200.00    |
| 258.30  | 261.00  | 85.00  | 4.97  | 27.90  | 62.90  | 0.71 | 30.70 | 2.01 | 29.90   | 2670000.00  |
| 88.70   | 138.30  | 177.20 | 10.36 | 24.20  | 80.10  | 0.91 | 29.70 | 2.05 | 14.70   | 500.00      |
| 876.20  | 199.80  | 344.40 | 20.14 | 27.40  | 56.00  | 0.63 | 25.20 | 2.27 | 194.60  | 581000.00   |
| 1834.40 | 1338.60 | 287.90 | 16.84 | 34.00  | 65.10  | 0.74 | 30.40 | 2.02 | 11.50   | 1530000.00  |
| 331.80  | 326.40  | 237.10 | 13.87 | 23.20  | 54.00  | 0.61 | 19.00 | 3.33 | 26.40   | 627000.00   |
| 127.10  | 95.50   | 366.60 | 21.44 | 25.50  | 61.00  | 0.69 | 15.80 | 3.05 | 825.00  | 109.00      |
| 785.60  | 746.90  | 217.80 | 12.74 | 31.80  | 94.50  | 1.07 | 24.20 | 2.33 | 354.10  | 3860000.00  |
| 173.40  | 147.80  | 91.10  | 5.33  | 17.30  | 55.00  | 0.62 | 50.00 | 1.59 | 1.70    | 475000.00   |
| 191.70  | 353.90  | 351.10 | 20.53 | 29.60  | 91.50  | 1.04 | 26.30 | 2.07 | 1777.00 | 29400.00    |
| 776.90  | 867.90  | 88.30  | 5.16  | 28.50  | 115.00 | 1.30 | 23.10 | 2.40 | 5.50    | 1390000.00  |

|         |         |        |       |       |        |      |       |      |        |               |
|---------|---------|--------|-------|-------|--------|------|-------|------|--------|---------------|
| 652.00  | 672.00  | 543.30 | 31.77 | 30.90 | 138.00 | 1.56 | 43.00 | 1.73 | 3.40   | 1750.00       |
| 29.70   | 49.60   | 205.00 | 11.99 | 35.90 | 33.00  | 0.37 | 18.90 | 2.73 | 3.50   | 4500.00       |
| 1638.30 | 1520.70 | 362.80 | 21.22 | 30.90 | 48.70  | 0.55 | 14.30 | 3.25 | 13.50  | 1220000.00    |
| 343.80  | 500.30  | 472.20 | 27.61 | 30.00 | 70.50  | 0.80 | 30.00 | 2.04 | 39.70  | 528000.00     |
| 332.70  | 299.70  | 206.00 | 12.05 | 24.20 | 65.90  | 0.75 | 38.00 | 1.62 | 63.60  | 372000.00     |
| 334.70  | 203.70  | 315.40 | 18.44 | 28.50 | 52.00  | 0.59 | 46.60 | 1.55 | 302.00 | 2740.00       |
| 69.10   | 39.10   | 243.90 | 14.26 | 29.80 | 52.70  | 0.60 | 22.10 | 2.39 | 56.60  | 23200.00      |
| 423.30  | 338.20  | 426.20 | 24.92 | 30.60 | 42.30  | 0.48 | 32.30 | 1.91 | 146.90 | 21500.00      |
| 114.50  | 33.40   | 177.70 | 10.39 | 17.70 | 103.40 | 1.17 | 17.50 | 2.76 | 8.60   | 500.00        |
| 964.70  | 753.80  | 485.10 | 28.37 | 34.90 | 65.60  | 0.74 | 27.30 | 2.16 | 25.40  | 8090000000.00 |
| 262.00  | 288.30  | 298.10 | 17.43 | 34.20 | 61.70  | 0.70 | 35.80 | 1.83 | 25.70  | 500.00        |
| 1863.20 | 1080.70 | 110.70 | 6.47  | 36.10 | 72.80  | 0.82 | 26.10 | 2.22 | 61.30  | 156000.00     |
| 1547.00 | 532.20  | 274.00 | 16.02 | 36.00 | 60.20  | 0.68 | 29.70 | 2.05 | 166.20 | 529000.00     |
| 125.30  | 195.90  | 126.70 | 7.41  | 26.40 | 56.00  | 0.63 | 33.50 | 1.90 | 30.60  | 661000.00     |
| 295.60  | 267.90  | 124.72 | 7.29  | 33.20 | 47.40  | 0.54 | 31.00 | 2.35 | 34.10  | 185000000.00  |
| 463.60  | 281.60  | 321.30 | 18.79 | 27.40 | 68.00  | 0.77 | 33.30 | 1.91 | 531.80 | 25600.00      |
| 151.00  | 213.40  | 211.70 | 12.38 | 27.10 | 68.30  | 0.77 | 35.30 | 1.84 | 67.00  | 781000.00     |
| 283.00  | 266.90  | 355.90 | 20.81 | 30.00 | 76.90  | 0.87 | 42.80 | 1.63 | 182.50 | 37100.00      |
| 753.40  | 458.30  | 199.90 | 11.69 | 38.20 | 68.00  | 0.77 | 48.30 | 1.51 | 72.80  | 8970000.00    |
| 1002.00 | 627.00  | 444.30 | 25.98 | 28.80 | 61.70  | 0.70 | 28.00 | 2.13 | 112.20 | 465000.00     |
| 1120.20 | 684.00  | 154.00 | 9.01  | 33.70 | 61.30  | 0.69 | 48.30 | 1.51 | 20.10  | 28100000.00   |
| 232.40  | 125.70  | 262.30 | 15.34 | 38.90 | 47.60  | 0.54 | 22.00 | 2.93 | 12.40  | 148000.00     |
| 295.60  | 372.90  | 423.50 | 24.77 | 29.50 | 46.90  | 0.53 | 37.40 | 1.77 | 272.2  | 1040.00       |
| 777.70  | 1037.80 | 293.40 | 17.16 | 29.60 | 50.50  | 0.57 | 24.20 | 2.33 | 43.90  | 5250.00       |
| 804.50  | 969.90  | 171.00 | 10.00 | 32.80 | 62.80  | 0.71 | 24.50 | 2.32 | 138.70 | 147000.00     |
| 200.90  | 155.80  | 215.60 | 12.61 | 24.40 | 59.00  | 0.67 | 36.90 | 1.79 | 139.50 | 4380.00       |
| 237.40  | 205.90  | 346.90 | 20.29 | 26.10 | 145.00 | 1.64 | 14.30 | 3.25 | 74.30  | 500.00        |
| 901.90  | 611.20  | 286.90 | 16.78 | 30.60 | 48.00  | 0.54 | 31.10 | 2.00 | 251.40 | 123000.00     |
| 358.80  | 309.00  | 99.50  | 5.82  | 32.40 | 52.60  | 0.60 | 48.70 | 1.50 | 32.00  | 25900000.00   |
| 358.80  | 309.00  | 99.50  | 5.82  | 32.40 | 52.60  | 0.60 | 48.70 | 1.50 | 32.00  | 25900000.00   |

|         |        |        |       |        |        |      |        |      |         |              |
|---------|--------|--------|-------|--------|--------|------|--------|------|---------|--------------|
| 187.00  | 99.40  | 353.80 | 20.69 | 28.40  | 74.90  | 0.85 | 38.60  | 1.74 | 40.80   | 6130.00      |
| 1008.10 | 543.20 | 216.20 | 12.64 | 31.90  | 80.80  | 0.91 | 38.60  | 1.74 | 518.90  | 226000.00    |
| 433.80  | 683.40 | 204.00 | 11.93 | 31.50  | 48.40  | 0.55 | 43.00  | 1.49 | 126.30  | 24200.00     |
| 169.10  | 100.40 | 130.80 | 7.65  | 33.60  | 66.30  | 0.75 | 32.40  | 1.94 | 5,8     | 134000.00    |
| 484.00  | 514.00 | 215.00 | 12.57 | 31.70  | 59.00  | 0.67 | 45.40  | 1.57 | 4.00    | 100.00       |
| 436.00  | 556.00 | 191.20 | 11.18 | 33.00  | 143.60 | 1.62 | 51.00  | 1.57 | 5.50    | 500.00       |
| 496.30  | 348.00 | 208.50 | 12.19 | 28.10  | 53.00  | 0.60 | 23.50  | 2.38 | 124.80  | 23900000.00  |
| 472.00  | 389.60 | 341.50 | 19.97 | 27.80  | 70.80  | 0.80 | 42.80  | 1.63 |         | 500.00       |
| 395.90  | 486.70 | 165.50 | 9.68  | 27.90  | 125.00 | 1.41 | 39.80  | 1.71 | >1000   | 467000.00    |
| 781.80  | 934.20 | 199.00 | 11.64 | 33.40  | 56.90  | 0.64 | 45.00  | 1.58 | >1000   | 13100000.00  |
| 85.70   | 124.90 | 266.50 | 15.58 | 29.90  | 96.00  | 1.09 | 51.50  | 1.50 | 16.80   | 99200.00     |
| 575.20  | 347.80 | 436.40 | 25.52 | 34.20  | 67.60  | 0.76 | 51.00  | 1.56 | 163.10  | 500.00       |
| 263.10  | 243.30 | 165.60 | 9.68  | 29.90  | 62.90  | 0.71 | 45.00  | 1.55 | 1000.00 | 511000.00    |
| 272.70  | 296.90 | 310.60 | 18.16 | 239.80 | 64.00  | 0.72 | 33.60  | 1.62 | 225.90  | 267000000.00 |
| 132.70  | 197.40 | 192.90 | 11.28 | 35.10  | 51.00  | 0.58 | 42.50  | 1.64 | 33.60   | 1160000.00   |
| 162.60  | 163.60 | 107.40 | 6.28  | 28.80  | 54.00  | 0.61 | 41.00  | 1.78 | 12.80   | 500.00       |
| 668.00  | 729.60 | 334.90 | 19.58 | 28.90  | 60.80  | 0.69 | 45.80  | 1.56 | 170.50  | 794000.00    |
| 129.10  | 138.60 | 174.00 | 10.18 | 143.90 | 66.20  | 0.75 | 44.70  | 1.59 | 248.70  | 5200000.00   |
| 644.40  | 406.20 | 184.80 | 10.81 | 31.20  | 72.00  | 0.81 | 40.00  | 2.00 | 36.00   | 556000.00    |
| 232.30  | 166.90 | 252.50 | 14.77 | 25.90  | 54.90  | 0.62 | 38.00  | 1.75 | 69.40   | 767000.00    |
| 203.80  | 145.10 | 334.40 | 19.56 | 28.20  | 56.00  | 0.63 | 44.00  | 1.86 | 628.70  | 192000.00    |
| 220.80  | 168.80 | 31.60  | 1.85  | 40.60  | 55.00  | 0.62 | 100.00 | 1.00 |         | 2970000.00   |
| 482.70  | 382.20 | 160.00 | 9.36  | 32.20  | 108.00 | 1.22 | 117.00 | 0.89 | 31.10   | 23900000.00  |
| 583.50  | 77.50  | 33.50  | 1.96  | 42.50  | 69.00  | 0.78 | 109.00 | 1.00 | 19.90   | 10400000.00  |
| 352.20  | 160.00 | 32.80  | 1.92  | 38.00  | 64.00  | 0.72 | 76.00  | 1.21 | 14.80   | 26400000.00  |
| 170.20  | 231.90 | 79.00  | 4.62  | 43.50  | 64.00  | 0.72 | 104.00 | 0.97 | 2.70    | 38000.00     |
| 611.80  | 403.80 | 61.60  | 3.60  | 34.50  | 54.00  | 0.61 | 53.00  | 1.64 | 80.80   | 24900.00     |
| 122.00  | 144.00 | 69.00  | 4.04  | 39.30  | 65.00  | 0.74 | 79.00  | 1.12 |         | 414.00       |
| 96.20   | 57.80  | 22.20  | 1.30  | 15.80  | 65.00  | 0.74 | 124.00 | 0.87 | 46.00   | 405.00       |
| 130.40  | 127.00 | 11.60  | 0.68  | 45.20  | 72.00  | 0.81 | 109.00 | 0.94 | 5.00    | 100.00       |

|         |         |        |       |       |       |      |        |      |        |              |
|---------|---------|--------|-------|-------|-------|------|--------|------|--------|--------------|
| 130.40  | 127.00  | 11.60  | 0.68  | 45.20 | 72.00 | 0.81 | 109.00 | 0.94 | 5.00   | 100.00       |
| 365.40  | 307.10  | 53.90  | 3.15  | 32.30 | 71.00 | 0.80 | 53.00  | 1.59 |        | 2100000.00   |
| 365.40  | 307.10  | 53.90  | 3.15  | 32.30 | 71.00 | 0.80 | 53.00  | 1.59 |        | 2100000.00   |
| 470.60  | 131.60  | 29.70  | 1.74  | 38.50 | 86.00 | 0.97 | 77.00  | 1.20 | 8.30   | 48600000.00  |
| 154.00  | 178.00  | 99.00  | 5.79  | 49.80 | 68.00 | 0.77 | 99.00  | 1.01 |        | 100.00       |
| 331.30  | 121.60  | 23.50  | 1.37  | 40.40 | 69.00 | 0.78 | 74.00  | 1.24 |        | 96400000.00  |
| 1622.60 | 744.70  | 21.10  | 1.23  | 35.40 | 68.00 | 0.77 | 70.00  | 1.28 | 1.00   | 100.00       |
| 181.00  | 78.10   | 4.30   | 0.25  | 38.20 | 88.00 | 1.00 | 84.00  | 1.13 |        | 257000000.00 |
| 504.60  | 1714.90 | 40.50  | 2.37  | 50.00 | 58.20 | 0.66 | 96.00  | 1.03 | 81.40  | 24800.00     |
| 181.00  | 78.10   | 4.30   | 0.25  | 38.20 | 88.00 | 1.00 | 84.00  | 1.13 |        | 257000000.00 |
| 78.60   | 69.50   | 15.90  | 0.93  | 36.50 | 69.00 | 0.78 | 86.00  | 1.11 | 9.40   | 2000000.00   |
| 432.10  | 155.80  | 23.30  | 1.36  | 66.70 | 66.00 | 0.75 | 93.10  | 1.00 | 7.20   | 53000000.00  |
| 111.70  | 36.00   | 51.10  | 2.99  | 37.10 | 79.00 | 0.89 | 100.00 | 1.00 |        | 1810.00      |
| 476.40  | 119.60  | 7.70   | 0.45  | 38.60 | 72.00 | 0.81 | 103.00 | 0.98 | 11.00  | 1.16         |
| 416.30  | 114.60  | 11.50  | 0.67  | 32.60 | 68.00 | 0.77 | 81.00  | 1.16 | 18.40  | 193000000.00 |
| 80.00   | 52.40   | 40.30  | 2.36  | 46.90 | 47.40 | 0.54 | 94.40  | 0.99 | 5.20   | 100.00       |
| 141.90  | 854.20  | 210.60 | 12.32 | 36.80 | 74.10 | 0.84 | 91.00  | 1.13 | 17.20  | 100.00       |
| 383.30  | 457.90  | 276.10 | 16.15 | 35.40 | 61.20 | 0.69 | 75.00  | 1.29 | 182.80 | 7520.00      |
| 147.90  | 61.30   | 22.20  | 1.30  | 45.50 | 72.00 | 0.81 | 78.00  | 1.18 | 2.90   | 1830000.00   |
| 1868.70 | 1024.60 | 74.70  | 4.37  | 41.00 | 51.00 | 0.58 | 80.00  | 1.23 | 2.70   | 4690.00      |
| 239.00  | 186.90  | 17.20  | 1.01  | 43.90 | 48.00 | 0.54 | 97.00  | 1.02 | 20.60  | 3330.00      |
| 753.70  | 248.30  | 31.10  | 1.82  | 39.00 | 83.00 | 0.94 | 95.00  | 1.09 |        | 26200000.00  |
| 267.30  | 276.00  | 24.50  | 1.43  | 33.90 | 48.50 | 0.55 | 80.00  | 1.23 | 224.80 | 1590000.00   |
| 180.90  | 44.60   | 18.70  | 1.09  | 40.10 | 73.00 | 0.83 | 85.00  | 1.12 | 3.50   | 16800.00     |
| 55.00   | 26.20   | 12.40  | 0.73  | 44.50 | 80.00 | 0.90 | 107.00 | 0.95 | 2.60   | 603.00       |
| 103.50  | 46.60   | 16.90  | 0.99  | 48.50 | 74.00 | 0.84 | 82.80  | 1.08 |        | 11000000.00  |
| 861.60  | 1637.50 | 51.20  | 2.99  | 35.20 | 76.30 | 0.86 | 91.00  | 1.13 | 18.90  | 2360000.00   |
| 328.60  | 122.90  | 30.20  | 1.77  | 37.80 | 63.00 | 0.71 | 93.00  | 1.11 | 25.20  | 237000.00    |
| 115.40  | 52.30   | 22.00  | 1.29  | 40.20 | 47.00 | 0.53 | 85.00  | 1.12 | 1.60   | 65400.00     |
| 662.70  | 376.30  | 40.00  | 2.34  | 36.70 | 66.00 | 0.75 | 92.00  | 1.05 | 35.80  | 13900000.00  |

|         |         |        |       |       |        |      |        |      |        |              |
|---------|---------|--------|-------|-------|--------|------|--------|------|--------|--------------|
| 675.70  | 1490.00 | 71.80  | 4.20  | 41.60 | 64.20  | 0.73 | 71.70  | 1.18 | 69.20  | 9860000.00   |
| 342.70  | 686.40  | 40.90  | 2.39  | 41.00 | 69.70  | 0.79 | 106.00 | 1.02 | 43.30  | 523000.00    |
| 138.00  | 78.40   | 11.30  | 0.66  | 38.60 | 55.00  | 0.62 | 82.80  | 1.08 | 8.30   | 25600000.00  |
| 64.20   | 37.00   | 17.60  | 1.03  | 49.50 | 51.00  | 0.58 | 66.30  | 1.16 |        | 25200000.00  |
| 319.20  | 136.50  | 370.20 | 21.65 | 37.50 | 75.40  | 0.85 | 63.00  | 1.46 | 394.60 | 3770.00      |
| 745.90  | 379.00  | 67.50  | 3.95  | 31.50 | 53.00  | 0.60 | 47.00  | 1.62 | 98.60  | 410000.00    |
| 434.40  | 192.90  | 134.20 | 7.85  | 32.30 | 72.80  | 0.82 | 61.00  | 1.42 | 341.20 | 2060000.00   |
| 550.60  | 1469.30 | 270.20 | 15.80 | 35.20 | 28.00  | 0.32 | 62.10  | 1.29 | 87.60  | 42000.00     |
| 1193.40 | 349.60  | 118.10 | 6.91  | 35.10 | 84.00  | 0.95 | 72.00  | 1.21 | 350.00 | 8790.00      |
| 1239.20 | 287.50  | 182.10 | 10.65 | 31.70 | 64.10  | 0.73 | 44.70  | 1.59 | 112.90 | 6140000.00   |
| 219.40  | 119.50  | 123.80 | 7.24  | 36.00 | 77.20  | 0.87 | 56.00  | 1.37 | 57.10  | 32900.00     |
| 120.20  | 89.00   | 395.90 | 23.15 | 28.90 | 63.10  | 0.71 | 64.80  | 1.26 | 189.90 | 500.00       |
| 64.00   | 72.30   | 192.30 | 11.25 | 32.40 | 71.50  | 0.81 | 46.00  | 1.34 | 7.30   | 500.00       |
| 530.30  | 346.30  | 68.50  | 4.01  | 36.10 | 72.00  | 0.81 | 76.90  | 1.13 | 48.80  | 623000000.00 |
| 268.20  | 196.30  | 112.70 | 6.59  | 36.60 | 62.00  | 0.70 | 62.00  | 1.33 | 443.00 | 500.00       |
| 753.30  | 538.30  | 82.80  | 4.84  | 29.70 | 74.00  | 0.84 | 29.30  | 2.07 | 380.90 | 1050000.00   |
| 78.10   | 60.60   | 50.20  | 2.94  | 31.90 | 62.00  | 0.70 | 59.00  | 1.33 | 34.90  | 10000.00     |
| 85.00   | 99.70   | 383.60 | 22.43 | 31.60 | 51.80  | 0.59 | 45.00  | 1.36 | 81.20  | 500.00       |
| 914.00  | 948.60  | 88.10  | 5.15  | 38.00 | 67.00  | 0.76 | 57.00  | 1.40 | 17.10  | 6050000.00   |
| 402.80  | 155.80  | 275.80 | 16.13 | 35.00 | 74.00  | 0.84 | 57.80  | 1.35 | 616.00 | 14800.00     |
| 97.00   | 91.90   | 316.60 | 18.51 | 29.40 | 38.00  | 0.43 | 70.80  | 1.19 | 319.30 | 274000.00    |
| 797.90  | 305.70  | 30.20  | 1.77  | 40.60 | 84.00  | 0.95 | 44.00  | 1.39 | 4.20   | 139000.00    |
| 109.60  | 153.60  | 138.20 | 8.08  | 21.20 | 104.00 | 1.18 | 47.00  | 1.54 |        | 2540000.00   |
| 984.80  | 1262.40 | 252.90 | 14.79 | 38.10 | 55.00  | 0.62 | 57.00  | 1.49 | 46.00  | 7350000.00   |
| 18.80   | 21.40   | 11.80  | 0.69  | 47.40 | 60.00  | 0.68 | NA     | NA   | NA     | NA           |
| 15.00   | 16.50   | 10.30  | 0.60  | 47.70 | 74.00  | 0.84 | NA     | NA   | NA     | NA           |
| 28.10   | 29.40   | 17.80  | 1.04  | 49.00 | 69.00  | 0.78 | NA     | NA   | NA     | NA           |
| 8.40    | 11.70   | 6.30   | 0.37  | 46.30 | 46.00  | 0.52 | NA     | NA   | NA     | NA           |
| 13.30   | 12.20   | 5.90   | 0.35  | 48.40 | 54.00  | 0.61 | NA     | NA   | NA     | NA           |
| 18.60   | 16.90   | 8.70   | 0.51  | 46.70 | 56.00  | 0.63 | NA     | NA   | NA     | NA           |

|       |       |       |      |       |       |      |    |    |    |    |
|-------|-------|-------|------|-------|-------|------|----|----|----|----|
| 69.40 | 41.50 | 13.10 | 0.77 | 52.40 | 71.00 | 0.80 | NA | NA | NA | NA |
| 13.80 | 16.40 | 9.20  | 0.54 | 49.10 | 61.00 | 0.69 | NA | NA | NA | NA |
| 36.20 | 22.20 | 8.70  | 0.51 | 43.70 | 43.00 | 0.49 | NA | NA | NA | NA |
| 33.70 | 27.70 | 8.00  | 0.47 | 45.50 | 57.00 | 0.64 | NA | NA | NA | NA |
| 8.90  | 17.00 | 9.90  | 0.58 | 51.10 | 57.00 | 0.64 | NA | NA | NA | NA |
| 31.50 | 22.40 | 5.90  | 0.35 | 46.00 | 50.00 | 0.57 | NA | NA | NA | NA |
| 8.30  | 15.90 | 13.60 | 0.80 | 50.80 | 52.00 | 0.59 | NA | NA | NA | NA |
| 42.60 | 23.80 | 8.30  | 0.49 | 48.10 | 67.00 | 0.76 | NA | NA | NA | NA |
| 10.00 | 16.40 | 7.20  | 0.42 | 49.70 | 56.00 | 0.63 | NA | NA | NA | NA |
| 11.50 | 13.90 | 10.30 | 0.60 | 44.20 | 53.00 | 0.60 | NA | NA | NA | NA |
| 19.50 | 18.20 | 8.20  | 0.48 | 47.20 | 47.00 | 0.53 | NA | NA | NA | NA |
| 10.70 | 15.70 | 12.80 | 0.75 | 46.60 | 59.00 | 0.67 | NA | NA | NA | NA |
| 17.50 | 15.50 | 7.30  | 0.43 | 49.80 | 56.00 | 0.63 | NA | NA | NA | NA |
| 13.10 | 11.90 | 8.00  | 0.47 | 51.80 | 57.00 | 0.64 | NA | NA | NA | NA |
| 23.40 | 24.70 | 14.00 | 0.82 | 48.70 | 77.00 | 0.87 | NA | NA | NA | NA |
| 47.20 | 78.00 | 25.60 | 1.50 | 46.40 | 76.00 | 0.86 | NA | NA | NA | NA |
| 12.00 | 17.50 | 10.50 | 0.61 | 50.50 | 60.00 | 0.68 | NA | NA | NA | NA |
| 13.50 | 13.90 | 18.50 | 1.08 | 53.40 | 50.00 | 0.57 | NA | NA | NA | NA |
| 10.70 | 13.50 | 13.00 | 0.76 | 47.10 | 44.00 | 0.50 | NA | NA | NA | NA |
| 9.20  | 13.90 | 10.50 | 0.61 | 46.90 | 61.00 | 0.69 | NA | NA | NA | NA |
| 15.70 | 13.50 | 9.40  | 0.55 | 50.70 | 50.00 | 0.57 | NA | NA | NA | NA |
| 11.70 | 17.60 | 16.00 | 0.94 | 48.70 | 69.00 | 0.78 | NA | NA | NA | NA |
| 24.50 | 16.90 | 5.80  | 0.34 | 46.90 | 42.00 | 0.48 | NA | NA | NA | NA |
| 11.50 | 13.30 | 59.00 | 3.45 | 42.70 | 48.00 | 0.54 | NA | NA | NA | NA |
| 24.00 | 19.60 | 12.70 | 0.74 | 41.80 | 63.00 | 0.71 | NA | NA | NA | NA |
| 24.00 | 19.60 | 12.70 | 0.74 | 41.80 | 63.00 | 0.71 | NA | NA | NA | NA |
| 11.80 | 13.90 | 10.20 | 0.60 | 47.20 | 50.00 | 0.57 | NA | NA | NA | NA |
| 9.40  | 11.70 | 23.50 | 1.37 | 47.30 | 55.00 | 0.62 | NA | NA | NA | NA |
| 11.50 | 12.20 | 8.30  | 0.49 | 46.40 | 49.00 | 0.55 | NA | NA | NA | NA |
| 32.70 | 26.30 | 7.00  | 0.41 | 46.40 | 60.00 | 0.68 | NA | NA | NA | NA |

|       |       |       |      |       |       |      |    |    |    |    |
|-------|-------|-------|------|-------|-------|------|----|----|----|----|
| 23.10 | 18.20 | 6.50  | 0.38 | 48.30 | 80.00 | 0.90 | NA | NA | NA | NA |
| 19.20 | 16.90 | 7.90  | 0.46 | 45.70 | 61.00 | 0.69 | NA | NA | NA | NA |
| 17.40 | 23.00 | 11.90 | 0.70 | 47.10 | 73.00 | 0.83 | NA | NA | NA | NA |
| 35.90 | 20.20 | 17.80 | 1.04 | 29.40 | 84.00 | 0.95 | NA | NA | NA | NA |
| 10.70 | 16.20 | 3.70  | 0.22 | 46.90 | 53.00 | 0.60 | NA | NA | NA | NA |
| 16.10 | 16.10 | 13.90 | 0.81 | 51.10 | 71.00 | 0.80 | NA | NA | NA | NA |
| 9.80  | 12.50 | 15.60 | 0.91 | 50.70 | 52.00 | 0.59 | NA | NA | NA | NA |
| 8.90  | 12.00 | 7.00  | 0.41 | 46.70 | 51.00 | 0.58 | NA | NA | NA | NA |



| HBVDNA-LOG | WBC   | NC    | LC   | NLR   | PLT    | CLU(ug/m<br>l_) |
|------------|-------|-------|------|-------|--------|-----------------|
| 14.83      | 4.32  | 2.95  | 0.82 | 3.60  | 20.10  | 30.60           |
| 9.44       | 2.82  | 2.11  | 0.41 | 5.15  | 61.40  | 67.03           |
| 17.29      | 5.50  | 3.80  | 0.90 | 4.22  | 96.00  | 54.27           |
| 13.06      | 6.16  | 3.90  | 0.79 | 4.94  | 141.00 | 86.34           |
| 12.35      | 6.90  | 3.60  | 2.70 | 1.33  | 123.00 | 100.64          |
| 10.77      | 6.92  | 2.15  | 4.05 | 0.53  | 131.00 | 40.15           |
| 11.84      | 3.89  | 2.86  | 0.82 | 3.49  | 100.00 | 89.12           |
| 7.29       | 3.35  | 1.66  | 1.36 | 1.22  | 71.00  | 59.92           |
| 10.41      | 5.62  | 3.65  | 1.26 | 2.90  | 166.00 | 80.92           |
| 15.25      | 17.21 | 13.69 | 2.39 | 5.73  | 67.00  | 70.97           |
| 13.50      | 4.91  | 1.58  | 2.41 | 0.66  | 50.00  | 86.34           |
| 10.25      | 6.53  | 3.98  | 1.65 | 2.41  | 131.00 | 69.42           |
| 17.78      | 8.32  | 5.10  | 1.88 | 2.71  | 121.40 | 62.80           |
| 8.05       | 2.27  | 1.34  | 0.66 | 2.03  | 30.40  | 32.07           |
| 8.07       | 4.28  | 3.07  | 0.78 | 3.94  | 87.00  | 50.39           |
| 8.26       | 6.70  | 2.78  | 3.11 | 0.89  | 76.00  | 53.55           |
| 14.24      | 9.45  | 5.80  | 2.28 | 2.54  | 110.40 | 46.72           |
| 5.37       | 2.32  | 0.88  | 0.95 | 0.93  | 65.40  | 38.33           |
| 14.53      | 4.82  | 2.80  | 1.38 | 2.03  | 66.40  | 37.58           |
| 9.38       | 3.61  | 2.74  | 0.52 | 5.27  | 65.00  | 51.09           |
| 4.61       | 9.83  | 7.79  | 0.76 | 10.25 | 19.40  | 30.12           |
| 19.06      | 16.60 | 14.90 | 1.20 | 12.42 | 62.00  | 49.76           |
| 6.35       | 7.41  | 4.53  | 2.17 | 2.09  | 175.40 | 30.15           |
| 6.21       | 14.16 | 12.85 | 0.44 | 29.20 | 142.40 | 90.99           |
| 15.74      | 5.65  | 3.69  | 1.18 | 3.13  | 85.80  | 16.22           |
| 6.91       | 2.74  | 2.21  | 0.29 | 7.62  | 46.40  | 50.82           |
| 11.05      | 3.65  | 1.70  | 1.02 | 1.67  | 70.00  | 35.69           |

|       |       |       |      |       |        |       |
|-------|-------|-------|------|-------|--------|-------|
| 13.96 | 8.74  | 7.17  | 0.98 | 7.32  | 134.30 | 29.95 |
| 7.37  | 6.44  | 4.84  | 1.18 | 4.10  | 90.00  | 62.27 |
| 13.03 | 6.30  | 3.10  | 2.20 | 1.41  | 45.00  | 12.62 |
| 13.23 | 3.70  | 2.10  | 1.00 | 2.10  | 43.00  | 40.84 |
| 12.35 | 5.00  | 3.50  | 0.80 | 4.38  | 125.00 | 35.30 |
| 16.85 | 4.03  | 1.77  | 1.77 | 1.00  | 93.00  | 42.33 |
| 12.32 | 8.72  | 7.13  | 0.88 | 8.10  | 76.00  | 38.35 |
| 13.65 | 5.58  | 3.33  | 1.47 | 2.27  | 117.40 | 20.22 |
| 9.51  | 4.64  | 3.05  | 1.02 | 2.99  | 100.00 | 25.44 |
| 11.00 | 7.56  | 4.95  | 1.41 | 3.51  | 82.60  | 21.95 |
| 12.86 | 10.19 | 8.71  | 0.77 | 11.31 | 292.00 | 18.82 |
| 4.91  | 2.79  | 1.94  | 0.49 | 3.96  | 31.40  | 25.75 |
| 9.97  | 5.81  | 3.82  | 1.45 | 2.63  | 135.00 | 18.32 |
| 1.42  | 5.38  | 2.73  | 1.79 | 1.53  | 133.50 | 30.68 |
| 0.28  | 1.58  | 0.81  | 0.53 | 1.53  | 47.20  | 18.58 |
| 8.45  | 3.35  | 2.61  | 0.49 | 5.33  | 28.20  | 20.80 |
| 8.40  | 5.96  | 4.36  | 0.90 | 4.84  | 96.40  | 29.10 |
| 5.34  | 8.41  | 4.78  | 2.47 | 1.94  | 112.40 | 12.17 |
| 6.21  | 6.28  | 3.47  | 2.11 | 1.64  | 74.40  | 18.24 |
| 11.50 | 6.49  | 5.23  | 0.54 | 9.69  | 21.80  | 69.96 |
| 14.80 | 4.67  | 2.90  | 1.10 | 2.64  | 25.60  | 23.62 |
| 6.21  | 8.76  | 6.68  | 1.15 | 5.81  | 43.40  | 39.53 |
| 13.27 | 14.83 | 11.01 | 3.42 | 3.22  | 162.00 | 28.22 |
| 14.24 | 5.33  | 4.16  | 0.86 | 4.84  | 122.40 | 42.29 |
| 13.35 | 6.45  | 4.82  | 0.96 | 5.02  | 47.40  | 33.34 |
| 4.69  | 7.34  | 5.69  | 0.84 | 6.77  | 111.00 | 53.07 |
| 15.17 | 3.39  | 2.34  | 0.76 | 3.08  | 97.00  | 65.67 |
| 13.07 | 2.60  | 1.17  | 1.08 | 1.08  | 31.10  | 28.01 |
| 10.29 | 6.23  | 4.14  | 1.26 | 3.29  | 109.00 | 20.36 |
| 14.14 | 6.99  | 5.40  | 0.83 | 6.51  | 144.00 | 28.39 |

|       |       |       |       |       |        |        |
|-------|-------|-------|-------|-------|--------|--------|
| 7.47  | 5.85  | 4.12  | 0.95  | 4.34  | 41.70  | 92.49  |
| 8.41  | 1.51  | 0.85  | 0.47  | 1.81  | 20.80  | 31.47  |
| 14.01 | 7.85  | 72.31 | 18.22 | 3.97  | 113.00 | 35.08  |
| 13.18 | 4.70  | 4.05  | 0.44  | 9.20  | 133.00 | 22.13  |
| 12.83 | 4.94  | 2.99  | 1.05  | 2.85  | 75.00  | 52.42  |
| 7.92  | 11.41 | 7.42  | 2.72  | 2.73  | 90.40  | 44.73  |
| 10.05 | 4.14  | 2.48  | 0.98  | 2.53  | 35.40  | 43.22  |
| 9.98  | 9.72  | 6.77  | 2.00  | 3.39  | 198.00 | 61.49  |
| 6.21  | 6.04  | 3.97  | 1.27  | 3.13  | 22.00  | 34.53  |
| 22.81 | 4.57  | 2.35  | 0.98  | 2.40  | 208.30 | 35.26  |
| 6.21  | 3.74  | 2.23  | 0.87  | 2.56  | 101.40 | 53.32  |
| 11.96 | 5.75  | 3.84  | 1.16  | 3.31  | 155.00 | 130.05 |
| 13.18 | 6.53  | 3.93  | 2.19  | 1.79  | 81.00  | 62.77  |
| 13.40 | 9.18  | 5.32  | 2.87  | 1.85  | 74.30  | 73.79  |
| 19.04 | 3.57  | 2.81  | 0.59  | 4.76  | 99.40  | 69.70  |
| 10.15 | 12.23 | 8.71  | 2.32  | 3.75  | 165.70 | 93.20  |
| 13.57 | 5.72  | 3.10  | 1.98  | 1.57  | 73.00  | 107.89 |
| 10.52 | 6.07  | 3.99  | 1.57  | 2.54  | 123.40 | 86.85  |
| 16.01 | 5.78  | 3.40  | 1.59  | 2.14  | 178.00 | 56.60  |
| 13.05 | 5.41  | 4.52  | 0.39  | 11.59 | 95.00  | 46.92  |
| 17.15 | 7.37  | 4.62  | 1.90  | 2.43  | 115.00 | 64.05  |
| 11.90 | 7.64  | 4.72  | 2.21  | 2.14  | 60.40  | 46.92  |
| 6.95  | 7.29  | 5.37  | 1.20  | 4.48  | 99.00  | 62.70  |
| 8.57  | 6.23  | 4.48  | 1.22  | 3.67  | 56.30  | 63.58  |
| 11.90 | 8.07  | 4.76  | 1.98  | 2.40  | 191.10 | 43.24  |
| 8.38  | 6.73  | 4.88  | 1.09  | 4.48  | 40.40  | 41.12  |
| 6.21  | 11.92 | 7.79  | 2.17  | 3.59  | 61.00  | 35.16  |
| 11.72 | 5.44  | 2.92  | 1.83  | 1.60  | 92.00  | 48.43  |
| 17.07 | 6.36  | 3.95  | 1.53  | 2.58  | 79.10  | 60.65  |
| 17.07 | 6.36  | 3.95  | 1.53  | 2.58  | 79.10  | 100.33 |

|       |      |      |      |       |        |        |
|-------|------|------|------|-------|--------|--------|
| 8.72  | 6.19 | 3.08 | 2.08 | 1.48  | 38.40  | 74.88  |
| 12.33 | 5.69 | 3.56 | 1.59 | 2.24  | 97.00  | 80.28  |
| 10.09 | 5.62 | 3.47 | 1.65 | 2.10  | 74.40  | 39.30  |
| 11.81 | 3.96 | 1.70 | 1.63 | 1.04  | 42.80  | 87.91  |
| 4.61  | 3.50 | 2.50 | 0.50 | 5.00  | 28.00  | 170.43 |
| 6.21  | 3.33 | 2.08 | 0.88 | 2.36  | 55.40  | 103.46 |
| 16.99 | 8.24 | 5.08 | 2.07 | 2.45  | 148.80 | 88.79  |
| 6.21  | 5.86 | 4.72 | 0.66 | 7.15  | 107.00 | 231.86 |
| 13.05 | 5.21 | 3.98 | 0.79 | 5.04  | 48.40  | 188.62 |
| 16.39 | 5.43 | 3.72 | 1.22 | 3.05  | 93.00  | 169.17 |
| 11.50 | 6.09 | 5.43 | 0.31 | 17.52 | 28.40  | 101.39 |
| 6.21  | 7.83 | 5.90 | 1.11 | 5.32  | 102.00 | 171.56 |
| 13.14 | 5.07 | 3.21 | 1.45 | 2.21  | 73.00  | 97.68  |
| 19.40 | 9.09 | 7.91 | 0.64 | 12.36 | 196.00 | 139.55 |
| 13.96 | 8.74 | 1.17 | 0.98 | 1.19  | 134.30 | 64.93  |
| 6.21  | 4.87 | 3.60 | 0.70 | 5.14  | 31.90  | 103.21 |
| 13.58 | 4.80 | 3.32 | 0.80 | 4.15  | 161.00 | 101.09 |
| 15.46 | 4.78 | 3.16 | 1.06 | 2.98  | 116.00 | 146.89 |
| 13.23 | 3.99 | 1.89 | 1.56 | 1.21  | 56.40  | 97.60  |
| 13.55 | 7.65 | 5.14 | 1.79 | 2.87  | 88.40  | 53.21  |
| 12.17 | 6.40 | 3.90 | 1.80 | 2.17  | 117.00 | 123.08 |
| 14.90 | 4.88 | 2.81 | 1.70 | 1.65  | 247.10 | 212.24 |
| 16.99 | 7.38 | 3.94 | 2.06 | 1.91  | 232.00 | 236.28 |
| 16.16 | 6.76 | 3.54 | 2.23 | 1.59  | 235.00 | 314.40 |
| 17.09 | 7.10 | 3.60 | 2.39 | 1.51  | 158.00 | 162.98 |
| 10.55 | 4.62 | 2.17 | 1.89 | 1.15  | 315.00 | 251.60 |
| 10.12 | 6.49 | 3.54 | 2.19 | 1.62  | 90.90  | 103.21 |
| 6.03  | 4.29 | 1.81 | 1.82 | 0.99  | 170.00 | 256.87 |
| 6.00  | 7.05 | 3.58 | 2.47 | 1.45  | 195.40 | 325.36 |
| 4.61  | 4.30 | 2.00 | 1.60 | 1.25  | 195.00 | 244.01 |

|       |       |      |      |      |        |        |
|-------|-------|------|------|------|--------|--------|
| 4.61  | 4.30  | 2.00 | 1.60 | 1.25 | 195.00 | 218.08 |
| 14.56 | 4.84  | 2.04 | 2.33 | 0.88 | 114.00 | 108.76 |
| 14.56 | 4.84  | 2.04 | 2.33 | 0.88 | 114.00 | 258.78 |
| 17.70 | 3.70  | 2.22 | 0.85 | 2.61 | 110.00 | 225.39 |
| 4.61  | 5.01  | 3.45 | 1.15 | 3.00 | 219.00 | 221.79 |
| 18.38 | 5.41  | 2.88 | 1.97 | 1.46 | 191.00 | 161.91 |
| 4.61  | 5.30  | 3.50 | 1.10 | 3.18 | 94.00  | 98.48  |
| 19.36 | 3.98  | 1.11 | 2.01 | 0.55 | 131.00 | 238.02 |
| 10.12 | 3.78  | 1.86 | 1.60 | 1.16 | 200.00 | 192.25 |
| 19.36 | 3.98  | 1.11 | 2.01 | 0.55 | 131.00 | 192.61 |
| 14.51 | 6.20  | 4.10 | 1.50 | 2.73 | 123.00 | 213.00 |
| 17.79 | 3.39  | 1.17 | 1.78 | 0.66 | 127.50 | 196.55 |
| 7.50  | 5.50  | 2.60 | 2.40 | 1.08 | 151.00 | 181.53 |
| 0.15  | 10.85 | 5.33 | 3.49 | 1.53 | 193.20 | 107.27 |
| 19.08 | 4.49  | 2.36 | 1.43 | 1.65 | 119.90 | 246.31 |
| 4.61  | 6.04  | 3.85 | 1.64 | 2.35 | 129.00 | 235.11 |
| 4.61  | 4.97  | 2.86 | 1.28 | 2.23 | 229.00 | 191.43 |
| 8.93  | 9.10  | 6.76 | 1.80 | 3.76 | 274.00 | 178.29 |
| 14.42 | 4.30  | 2.30 | 1.50 | 1.53 | 204.00 | 168.97 |
| 8.45  | 6.07  | 3.30 | 1.69 | 1.95 | 170.00 | 186.19 |
| 8.11  | 5.39  | 2.48 | 2.25 | 1.10 | 280.10 | 150.21 |
| 17.08 | 5.45  | 2.82 | 1.81 | 1.56 | 159.00 | 152.16 |
| 14.28 | 3.39  | 1.42 | 1.48 | 0.96 | 73.00  | 185.79 |
| 9.73  | 5.77  | 2.66 | 2.45 | 1.09 | 167.00 | 162.93 |
| 6.40  | 6.25  | 3.43 | 2.15 | 1.60 | 203.00 | 192.89 |
| 16.21 | 5.83  | 3.48 | 1.80 | 1.93 | 170.00 | 159.23 |
| 14.67 | 3.70  | 2.29 | 1.04 | 2.20 | 215.00 | 141.47 |
| 12.38 | 4.60  | 2.11 | 2.01 | 1.05 | 132.00 | 217.71 |
| 11.09 | 4.00  | 2.30 | 1.30 | 1.77 | 150.00 | 184.88 |
| 16.45 | 3.21  | 1.49 | 1.16 | 1.28 | 21.90  | 211.98 |

|       |       |       |      |       |        |        |
|-------|-------|-------|------|-------|--------|--------|
| 16.10 | 5.57  | 4.10  | 0.99 | 4.14  | 126.00 | 199.21 |
| 13.17 | 5.22  | 3.17  | 1.71 | 1.85  | 213.00 | 155.16 |
| 17.06 | 6.00  | 2.70  | 2.60 | 1.04  | 165.00 | 140.47 |
| 17.04 | 6.14  | 2.73  | 2.66 | 1.03  | 255.40 | 208.03 |
| 8.23  | 6.45  | 3.90  | 1.93 | 2.02  | 151.00 | 129.69 |
| 12.92 | 5.38  | 2.73  | 1.92 | 1.42  | 124.90 | 188.86 |
| 14.54 | 7.17  | 3.94  | 2.31 | 1.71  | 195.30 | 209.18 |
| 10.65 | 6.78  | 3.80  | 2.43 | 1.56  | 261.00 | 166.38 |
| 9.08  | 4.14  | 2.29  | 1.57 | 1.46  | 147.00 | 195.63 |
| 15.63 | 8.91  | 5.41  | 2.44 | 2.22  | 163.10 | 307.94 |
| 10.40 | 6.36  | 3.66  | 2.17 | 1.69  | 141.00 | 157.97 |
| 6.21  | 7.33  | 4.29  | 2.36 | 1.82  | 100.40 | 229.07 |
| 6.21  | 1.29  | 0.86  | 0.25 | 3.44  | 21.00  | 175.31 |
| 20.25 | 8.78  | 4.66  | 2.99 | 1.56  | 183.10 | 70.22  |
| 6.21  | 5.43  | 2.62  | 2.00 | 1.31  | 86.70  | 203.34 |
| 13.86 | 5.21  | 3.29  | 1.29 | 2.55  | 94.00  | 214.28 |
| 9.21  | 3.22  | 1.30  | 1.61 | 0.81  | 50.40  | 79.88  |
| 6.21  | 20.06 | 18.07 | 1.62 | 11.15 | 148.00 | 153.26 |
| 15.62 | 5.06  | 2.39  | 1.88 | 1.27  | 145.60 | 188.56 |
| 9.60  | 5.37  | 2.42  | 2.11 | 1.15  | 133.60 | 136.13 |
| 12.52 | 5.69  | 2.40  | 2.53 | 0.95  | 163.40 | 117.91 |
| 11.84 | 4.87  | 2.28  | 1.64 | 1.39  | 108.70 | 147.74 |
| 14.75 | 23.02 | 21.29 | 0.68 | 31.31 | 89.50  | 139.08 |
| 15.81 | 8.21  | 6.21  | 1.43 | 4.34  | 170.00 | 232.22 |
| NA    | 4.87  | 2.90  | 1.41 | 2.06  | 190.20 | 237.80 |
| NA    | 4.93  | 2.91  | 1.47 | 1.98  | 234.50 | 210.03 |
| NA    | 5.72  | 2.55  | 2.69 | 0.95  | 287.30 | 253.57 |
| NA    | 5.29  | 3.21  | 1.63 | 1.97  | 355.10 | 232.22 |
| NA    | 6.89  | 4.97  | 1.38 | 3.60  | 265.00 | 229.72 |
| NA    | 7.42  | 4.20  | 2.07 | 2.03  | 217.20 | 313.48 |

|    |       |       |      |      |        |        |
|----|-------|-------|------|------|--------|--------|
| NA | 4.49  | 2.29  | 1.79 | 1.28 | 235.50 | 261.45 |
| NA | 7.98  | 4.41  | 2.89 | 1.53 | 313.50 | 157.71 |
| NA | 9.09  | 5.67  | 2.90 | 1.96 | 204.50 | 247.63 |
| NA | 6.61  | 2.86  | 3.31 | 0.86 | 247.60 | 239.53 |
| NA | 5.15  | 2.79  | 1.83 | 1.52 | 227.90 | 216.88 |
| NA | 6.25  | 3.51  | 2.41 | 1.46 | 295.90 | 209.15 |
| NA | 5.65  | 3.15  | 1.95 | 1.62 | 256.00 | 226.18 |
| NA | 5.34  | 2.25  | 2.71 | 0.83 | 151.40 | 201.25 |
| NA | 4.51  | 2.37  | 1.87 | 1.27 | 226.20 | 232.88 |
| NA | 4.78  | 2.81  | 1.60 | 1.76 | 333.90 | 230.18 |
| NA | 5.42  | 3.34  | 1.57 | 2.13 | 144.20 | 249.16 |
| NA | 7.16  | 4.92  | 1.37 | 3.59 | 220.70 | 238.45 |
| NA | 5.53  | 3.28  | 1.82 | 1.80 | 246.50 | 300.77 |
| NA | 8.61  | 6.34  | 1.82 | 3.48 | 220.30 | 240.45 |
| NA | 5.37  | 3.28  | 1.58 | 2.08 | 156.50 | 207.90 |
| NA | 7.33  | 4.44  | 2.25 | 1.97 | 203.30 | 246.54 |
| NA | 5.84  | 3.47  | 1.99 | 1.74 | 250.50 | 204.38 |
| NA | 12.71 | 10.67 | 1.43 | 7.46 | 278.90 | 244.72 |
| NA | 4.71  | 2.75  | 1.55 | 1.77 | 197.10 | 264.52 |
| NA | 7.89  | 4.96  | 2.29 | 2.17 | 257.00 | 258.47 |
| NA | 6.84  | 4.84  | 1.37 | 3.53 | 267.20 | 281.30 |
| NA | 6.22  | 3.28  | 2.33 | 1.41 | 210.90 | 174.05 |
| NA | 4.67  | 2.86  | 1.40 | 2.04 | 220.30 | 198.99 |
| NA | 5.11  | 3.01  | 1.72 | 1.75 | 300.70 | 224.41 |
| NA | 6.64  | 3.95  | 2.22 | 1.78 | 228.10 | 178.14 |
| NA | 7.65  | 3.81  | 3.09 | 1.23 | 244.00 | 185.42 |
| NA | 8.00  | 5.77  | 1.65 | 3.50 | 277.70 | 173.41 |
| NA | 6.50  | 4.41  | 1.67 | 2.64 | 156.60 | 144.80 |
| NA | 6.80  | 3.85  | 2.13 | 1.81 | 282.00 | 171.20 |
| NA | 5.24  | 2.90  | 1.71 | 1.70 | 190.70 | 147.11 |

|    |      |      |      |      |        |        |
|----|------|------|------|------|--------|--------|
| NA | 8.76 | 5.35 | 2.64 | 2.03 | 281.60 | 168.81 |
| NA | 8.53 | 4.96 | 2.95 | 1.68 | 219.80 | 151.12 |
| NA | 5.08 | 2.80 | 1.86 | 1.51 | 220.30 | 208.82 |
| NA | 6.12 | 3.90 | 1.60 | 2.44 | 153.70 | 144.57 |
| NA | 4.89 | 2.97 | 1.54 | 1.93 | 322.50 | 168.14 |
| NA | 7.96 | 4.18 | 3.09 | 1.35 | 288.50 | 175.12 |
| NA | 5.81 | 4.32 | 1.07 | 4.04 | 204.30 | 157.87 |
| NA | 4.51 | 2.76 | 1.46 | 1.89 | 248.60 | 171.60 |
